# Supplementary material for: Targeting the Extracellular Signal-Regulated Kinase 5 Pathway to Suppress Human Chronic Myeloid Leukemia Stem Cells
Source: PubMed Central journal article supplement — Stem Cell Reports. 2018 Sep 20;11(4):929–43. doi: 10.1016/j.stemcr.2018.08.016 (PMC6178886; doi:10.1016/j.stemcr.2018.08.016), 2018-09-20
Supplement: mmc1.pdf [file mmc1.pdf]

**Stem Cell Reports, Volume 11**

**Supplemental Information**

**Targeting the Extracellular Signal-Regulated Kinase 5 Pathway to Suppress Human Chronic Myeloid Leukemia Stem Cells**

**Ignazia Tusa, Giulia Cheloni, Martina Poteti, Antonella Gozzini, Ngoc Ho DeSouza, Yi Shan, Xianming Deng, Nathanael S. Gray, Shaoguang Li, Elisabetta Roviada, and Persio Dello Sbarba**

Supplementary Figure 1

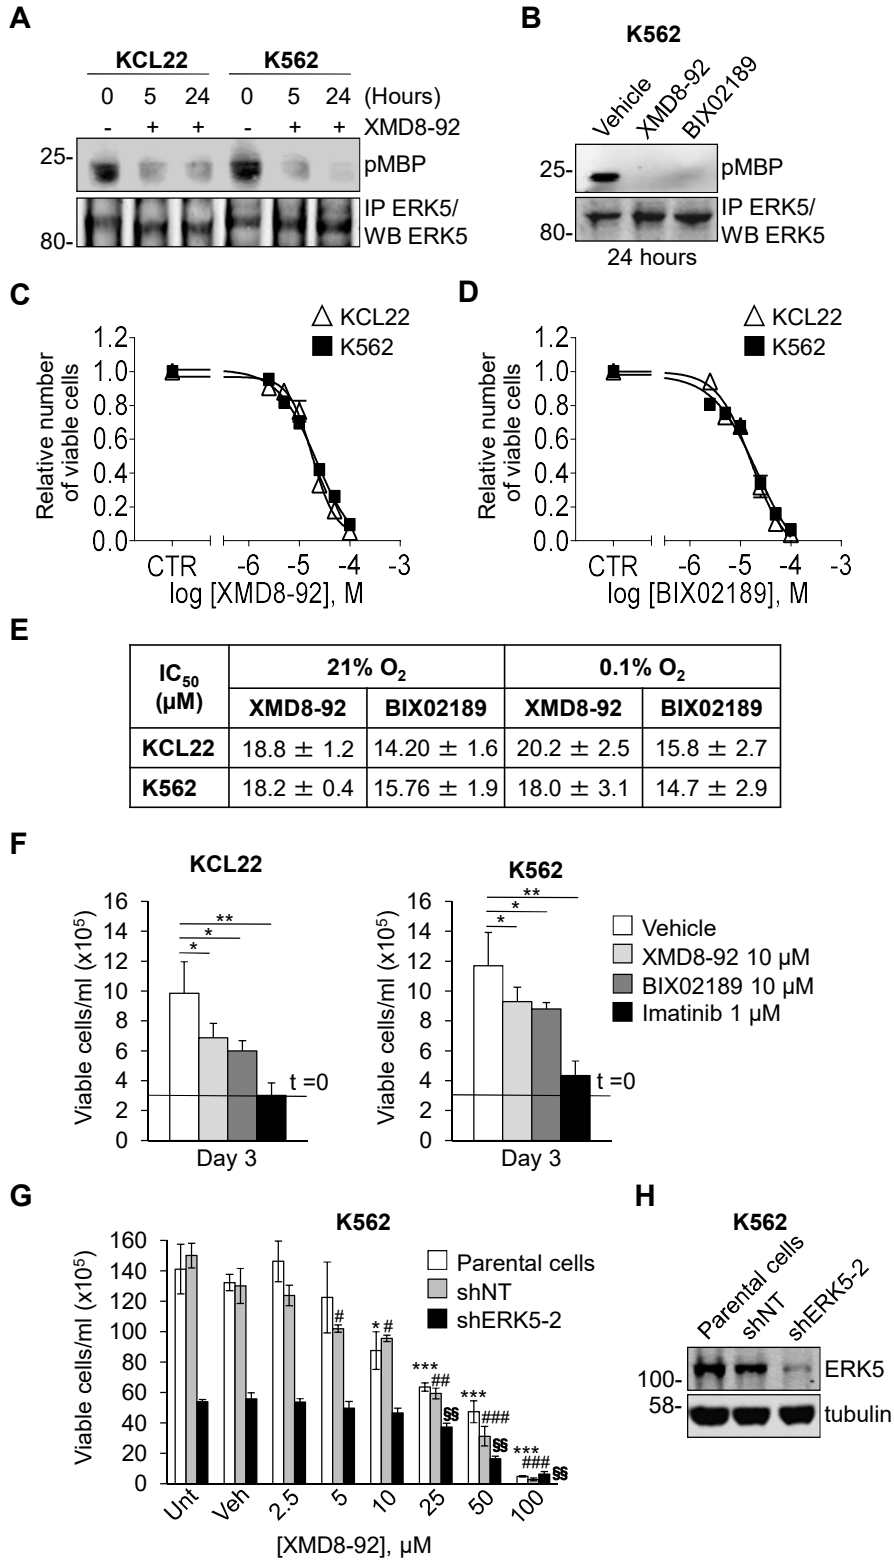

Supplementary Figure 2

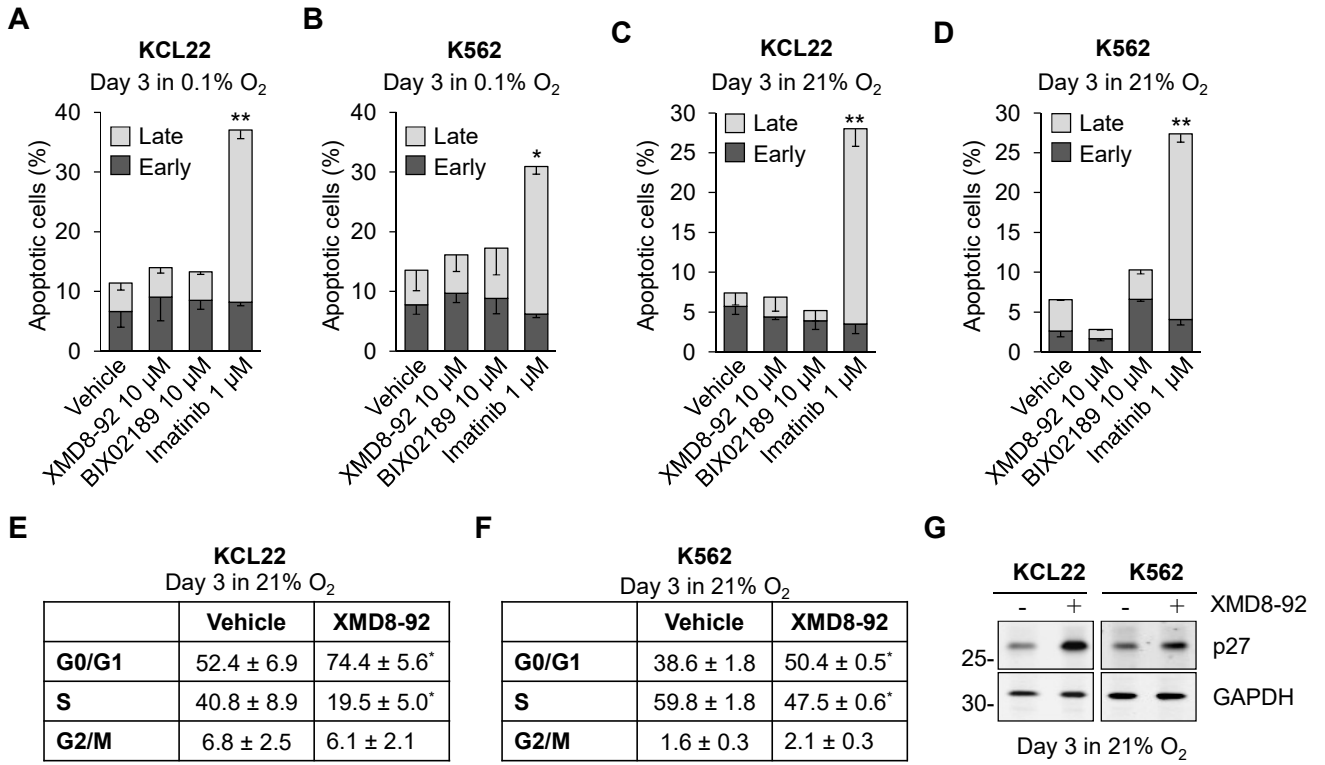

Supplementary Figure 3

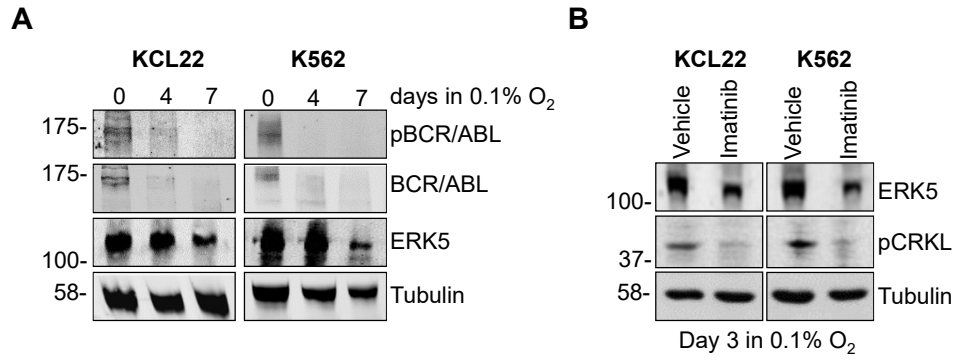

Supplementary Figure 4

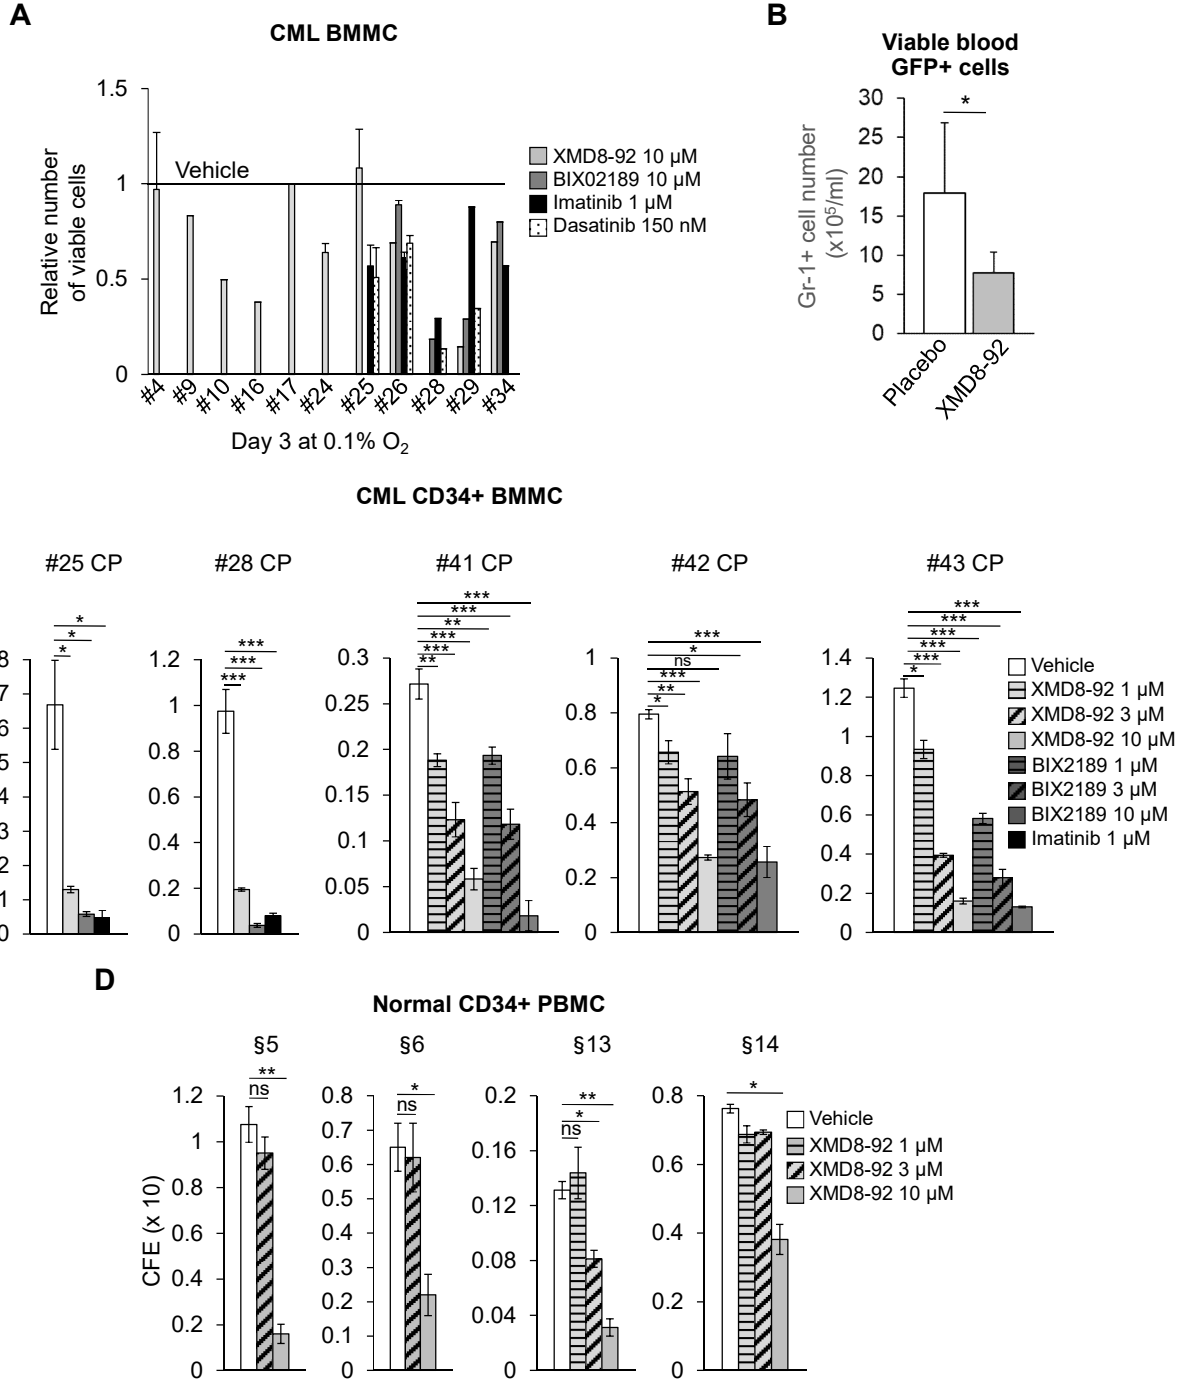

Supplementary Figure 5

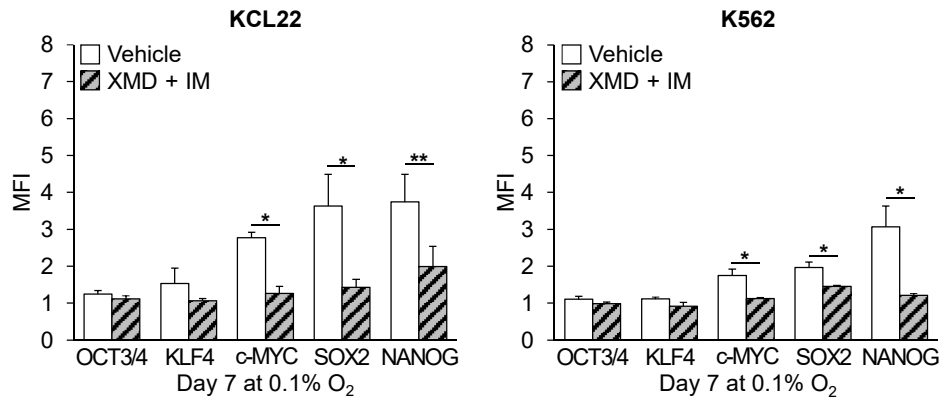

## Targeting the Extracellular signal-Regulated Kinase 5 pathway to suppress human chronic myeloid leukemia stem cells

Ignazia Tusa<sup>1,2</sup>, Giulia Cheloni<sup>1,2</sup>, Martina Poteti<sup>1</sup>, Antonella Gozzini<sup>3</sup>, Ngoc Ho DeSouza<sup>4</sup>,  
Yi Shan<sup>4</sup>, Xianming Deng<sup>5</sup>, Nathanael S Gray<sup>5</sup>, Shaoguang Li<sup>4</sup>,  
Elisabetta Rovida<sup>1,2,6</sup> and Persio Dello Sbarba<sup>1,2,6</sup>

<sup>1</sup>Department of Experimental and Clinical Biomedical Sciences, Università degli Studi di Firenze, Firenze 50134, Italy; <sup>2</sup>Istituto Toscano Tumori (ITT), Firenze 50134, Italy; <sup>3</sup>Hematology Unit, Careggi University Hospital (AOUC), Firenze 50134, Italy; <sup>4</sup>Department of Medicine, University of Massachusetts, Worcester, MA 01605, USA; <sup>5</sup>Dana-Farber Cancer Institute, Harvard Medical School, Boston, MA 02115; <sup>6</sup>co-senior author.

### SUPPLEMENTARY FIGURE LEGENDS

**Supplementary Figure 1. A, B) Pharmacological inhibition of ERK5 activity.** KCL22 or K562 cells were treated with DMSO (Vehicle), 10  $\mu$ M XMD8-92 or 10  $\mu$ M BIX02189 for the indicated times and lysed. Immunoprecipitated ERK5 was subjected to nonradioactive *in vitro* kinase assay. The drugs impaired ERK5 ability to phosphorylate its substrate myelin basic protein (MBP). Migration of molecular weight markers is indicated (kDa). **C-E) Determination of XMD8-92 and BIX02189 IC50.** Dose-response curves of XMD8-92 (C) and BIX02189 (D) in KCL22 or K562 cells after 72 hours of treatment or DMSO (CTR) in 21% O<sub>2</sub>. Values are means  $\pm$  SD of data from three independent experiments normalized to matched vehicle-treated sample. (E) IC50 values for XMD8-92 and BIX02189 in CML cells treated for 72 hours in 21% or 0.1% O<sub>2</sub>. Values represent means  $\pm$  SD of data from three independent experiments. **F) Effects of MEK5/ERK5 inhibitors on KCL22 and K562 cell number in 21% O<sub>2</sub>.** Cells were treated with DMSO (Vehicle) or inhibitors at the indicated concentrations from time 0 and viable cells were counted on day 3. Values represent means  $\pm$  SD of

data from three independent experiments; \* $p < 0.05$ ; \*\* $p < 0.01$ . **G, H)** *Effects of XMD8-92 on the number of viable ERK5-silenced CML cells.* (G) Parental or transduced K562 cells with non-targeting control (shNT) or one ERK5-targeting shRNA (shERK5-2) and left untreated (Unt) or treated with DMSO (Veh) or XMD8-92 at the indicated concentration from time 0 and viable cells were counted on day 3. Values are means  $\pm$  SD of three independent experiments. \* $p \leq 0.05$ ; \*\*\* $p \leq 0.001$ ; ns, not significant. (H) Immuno-blotting from total cell lysates of parental or transduced K562 cells with shNT or shERK5-2. Tubulin is loading control. Migration of molecular weight markers is indicated (kDa).

**Supplementary Figure 2.** *Effects of MEK5/ERK5 inhibitors on KCL22 and K562 apoptosis and cycle phase distribution.* **A-D)** Cells were incubated in 0.1% (A, B) or 21% O<sub>2</sub> (C, D) and treated with DMSO (Vehicle) or inhibitors at the indicated concentrations from time 0. The percentages of cells in early or late apoptosis were measured by Annexin V test and flow cytometry on day 3 of incubation. Values represent means  $\pm$  SD of data from three independent experiments; \* $p < 0.05$ , \*\* $p < 0.01$  versus vehicle. **E, F)** Cell cycle phase distribution obtained from cells treated as C and D; data from three independent experiments are shown (means  $\pm$  SEM) in the Table; \*,  $p \leq 0.05$  versus vehicle. **G)** Immuno-blotting of total lysates of cells treated as in C and D; GAPDH is a loading control; migration of molecular weight markers (kDa) is indicated; representative images from four independent experiments are shown.

**Supplementary Figure 3. A)** *Effects of incubation in 0.1% O<sub>2</sub> on the expression of ERK5 protein in CML cell lines.* KCL22 or K562 cells were incubated in 0.1% O<sub>2</sub> for indicated times. Immuno-blotting from total cell lysates was then performed. Tubulin is a loading control. Migration of molecular weight markers is indicated (kDa). **B)** *Effects of imatinib on the expression of ERK5 protein in CML cell lines in low oxygen.* KCL22 or K562 cells were incubated in 0.1% O<sub>2</sub> and treated with DMSO (Vehicle) or 1  $\mu$ M imatinib from time 0 to day 3. Immuno-blotting from total cell lysates was



then performed. Tubulin is a loading control. Migration of molecular weight markers is indicated (kDa).

**Supplementary Figure 4. A)** *Effects of MEK5/ERK5 inhibitors on the number of viable primary CML cells.* BMMC explanted from 11 CML patients were incubated at 0.1% O<sub>2</sub> in cultures treated with DMSO (Vehicle) or the indicated inhibitors and viable cells were counted at day 3. (A) Values are data from single experiments (performed in duplicate when error bars, indicating SD, are present) normalized for the respective vehicle-treated control. These data are averaged in Figure 3A. **B)** *Effects of XMD8-92 on leukemic PB WBC in vivo.* CML mice (mice/group: n=6) were treated twice daily with XMD8-92 (50 mg/Kg) or placebo and euthanized after 1 additional day. The number of GFP+ (leukemic) PB myeloid (Gr-1+) cells are shown as means ± SD. \*, p < 0.05. **C, D)** *Effects of XMD8-92 on CFA of primary CML or normal CD34+ cells.* CD34<sup>+</sup>-enriched BMMC from CML patients (C) or CD34<sup>+</sup>-enriched PBMC from healthy donors (D) were plated in methylcellulose containing medium and treated with DMSO (Vehicle) or inhibitors at the indicated concentrations from time 0 and the number of colonies was scored after 7 days. CFE values are means ± SD of data from single experiments performed in duplicate; \*p ≤ 0.05; \*\*p ≤ 0.01; \*\*\*p ≤ 0.001; ns, not significant.

**Supplementary Figure 5. Effects of the pharmacological inhibition of ERK5 on the expression of stem cell markers.** KCL22 or K562 cells were incubated in 0.1% O<sub>2</sub> and treated with DMSO (Vehicle) or the combination (XMD + IM) of XMD8-92 (10 μM) and imatinib (1 μM) for 7 days and the expression of stem cell markers was then measured by flow cytometry. Values are means ± SD of mean fluorescence intensity (MFI) data obtained from four independent experiments; \*, p < 0.05; \*\*, p < 0.01.

**Supplementary Table 1. Specification of antibodies used in the experiments.**

| <b>Protein</b>  | <b>Use</b> | <b>Source</b>     | <b>Notes</b> | <b>Cat. No.</b> | <b>Company</b>                                |
|-----------------|------------|-------------------|--------------|-----------------|-----------------------------------------------|
| pABL-Y245       | WB         | rabbit polyclonal |              | #2862           | Cell Signaling Technology, Danvers, MA, USA   |
| c-ABL           | WB         | rabbit polyclonal |              | #2861           | Cell Signaling Technology, Danvers, MA, USA   |
| pERK5-T218/Y220 | WB         | rabbit polyclonal |              | #3371           | Cell Signaling Technology, Danvers, MA, USA   |
| ERK5            | WB         | rabbit polyclonal |              | #3372           | Cell Signaling Technology, Danvers, MA, USA   |
| ERK5            | IP         | rabbit polyclonal | C-20         | c-1284          | Santa Cruz Biotechnology, Santa Cruz, CA, USA |
| p27Kip1         | WB         | rabbit polyclonal |              | #2552           | Cell Signaling Technology, Danvers, MA, USA   |
| pCRKL-Y207      | WB         | rabbit polyclonal |              | #3181           | Cell Signaling Technology, Danvers, MA, USA   |
| VINCULIN        | WB         | mouse monoclonal  |              | V9131           | Sigma-Aldrich St. Louis, MO, USA              |
| GAPDH           | WB         | goat polyclonal   | V-18         | sc-20357        | Santa Cruz Biotechnology, Santa Cruz, CA, USA |
| TUBULIN         | WB         | mouse monoclonal  |              | sc-32293        | Santa Cruz Biotechnology, Santa Cruz, CA, USA |
| OCT3/4          | FC         | mouse monoclonal  | C-10         | sc-5279         | Santa Cruz Biotechnology, Santa Cruz, CA, USA |
| KLF4            | FC         | mouse monoclonal  |              | #09-0021        | Stemgent, San Diego, CA, USA                  |
| c-MYC           | FC         | rabbit polyclonal |              | #9402           | Cell Signaling Technology, Danvers, MA, USA   |
| SOX2            | FC         | rabbit monoclonal |              | #3579           | Cell Signaling Technology, Danvers, MA, USA   |
| NANOG           | FC         | rabbit monoclonal |              | #4903           | Cell Signaling Technology, Danvers, MA, USA   |
| CD26-PE         | FC         | mouse monoclonal  | 2A6          | #12-0269        | Affymetrix eBioscience, San Diego, CA, USA    |
| pMBP            | WB         | mouse monoclonal  | P12          | #05-429         | Merck Millipore, Billerica, MA, USA           |
| CD34-FITC       | FC         | mouse monoclonal  | 4H11[APG]    | #21270343       | Immuno Tools, Friesoythe, Germany             |

WB, western blotting; FC, flow cytometry.

**Supplementary Table 2. Lentiviral shRNA sequences used in gene knockdown.**

| <b>Clone number</b>             | <b>Region</b> | <b>Sequence</b>                                                     |
|---------------------------------|---------------|---------------------------------------------------------------------|
| control vector<br>TRC1.5-pLKO.1 | none          | 5'-CCGGCAACAAGATGAAGAGCACCAACTC<br>GAGTTGGTGCTCTTCATCTTGTTGTTTT-3'  |
| TRCN0000010271                  | ERK5 CDS      | 5'CCGGCCAGTCCAACCTACCAGTCCTCTCG<br>AGAGGACTGGTAGGTTGGACTGGTTTT-3'   |
| TRCN0000010275                  | ERK5 CDS      | 5'-CCGGGCCAAGTACCATGATCCTGATCTCG<br>AGATCAGGATCATGGTACTTGGCTTTTT-3' |

CDS, coding sequence.
